# Supplementary material
Source: PubMed Central journal article supplement (PMC3913253)
Supplement: CJN.13071212_CJN13071212SupplementaryData1.pdf [file CJN.13071212_CJN13071212SupplementaryData1.pdf]

All Author affiliations

Kazumoto Iijima, Kandai Nozu:

Department of Pediatrics, Kobe University Graduate School of Medicine, Kobe, Japan

Mayumi Sako, Hidefumi Nakamura:

Division for Clinical Trials, Clinical Research Center, National Center for Child Health and Development, Tokyo, Japan

Mari Saito Oba:

Department of Biostatistics and Epidemiology, Graduate School of Medicine, Yokohama City University, Yokohama, Japan

Shuichi Ito, Koichi Kamei:

Department of Nephrology and Rheumatology, National Center for Child Health and Development, Tokyo, Japan

Hiroshi Hataya, Kenji Ishikura, Masataka Honda:

Department of Nephrology, Tokyo Metropolitan Children's Medical Center, Fuchu, Tokyo, Japan

Ryojiro Tanaka:

Department of Nephrology, Hyogo Prefectural Kobe Children's Hospital, Kobe, Japan

Yoko Ohwada:

Department of Pediatrics, Dokkyo Medical University School of Medicine, Tochigi, Japan

Nahoko Yata:

Department of Pediatrics, Tokyo Metropolitan Children's Medical Center, Fuchu, Tokyo, Japan

Michio Nagata:

Kidney and Vascular Pathology, Faculty of Medicine, University of Tsukuba, Tsukuba, Japan

Yasuo Ohashi:

Department of Biostatistics, School of Public Health, The University of Tokyo, Tokyo,  
Japan

Koichi Nakanishi, Norishige Yoshikawa:

Department of Pediatrics, Wakayama Medical University, Wakayama, Japan
